# Supplementary material for: Association of a History of Child Abuse With Impaired Myelination in the Anterior Cingulate Cortex: Convergent Epigenetic, Transcriptional, and Morphological Evidence
Source: Atypon-hosted journal article supplement (doi:10.1176/appi.ajp.2017.16111286), 2017-07-28
Supplement: appi.ajp.2017.16111286.ds001.pdf [file appi.ajp.2017.16111286.ds001.pdf]

 


Psychiatry Online
